# Supplementary material for: Nucleophile sensitivity of Drosophila TRPA1 underlies light-induced feeding deterrence
Source: eLife journal article supplement (doi:10.7554/elife.18425), 2016-09-22
Supplement: supp [file elife-18425-supp-v1.zip]

Archive with 16 entries (16 files):
- elife_poa_e18425_Figure_1_figure_supplement_2.pdf
- elife_poa_e18425_Figure_6_figure_supplement_2.pdf
- elife_poa_e18425_Figure_2_figure_supplement_1.pdf
- elife_poa_e18425_Figure_4_figure_supplement_3.pdf
- elife_poa_e18425_Figure_7_figure_supplement_1.pdf
- elife_poa_e18425_Figure_1_figure_supplement_1.pdf
- elife_poa_e18425_Figure_5_figure_supplement_2.pdf
- elife_poa_e18425_Figure_4_figure_supplement_1.pdf
- elife_poa_e18425_Figure_2_figure_supplement_2.pdf
- elife_poa_e18425_Figure_3_figure_supplement_1.pdf
- elife_poa_e18425_Figure_4_figure_supplement_2.pdf
- elife_poa_e18425_Figure_1_figure_supplement_3.pdf
- elife_poa_e18425_Supplementary_File_1.pptx
- elife_poa_e18425_Figure_6_figure_supplement_1.pdf
- elife_poa_e18425_Figure_6_figure_supplement_3.pdf
- elife_poa_e18425_Figure_5_figure_supplement_1.pdf
