# Supplementary material for: Nucleophile sensitivity of Drosophila TRPA1 underlies light-induced feeding deterrence
Source: eLife journal article supplement (doi:10.7554/elife.18425), 2016-09-22
Supplement: supp [file elife-18425-supp-v1.zip › elife_poa_e18425_Figure_1_figure_supplement_2.pdf]

## Figure 1- figure supplement 2

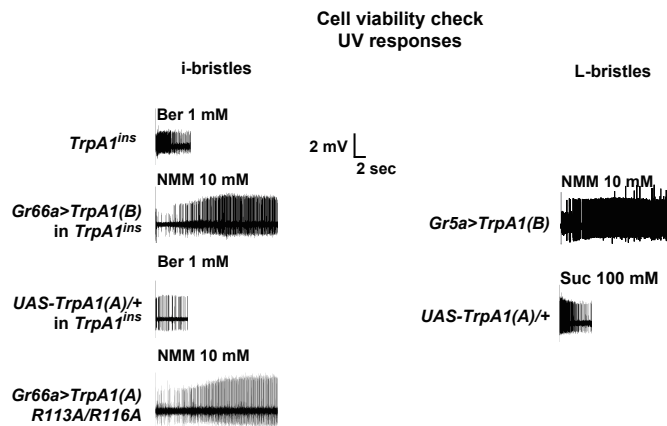

**Figure 1-figure supplement 2: Cell viability check for non-responders in extracellular recording experiments.** The non-responding bristle sensilla in the experiments examining UV responsiveness were stimulated by known tastants activating corresponding cells. For i- and L-bristles, 1 mM berberine and 100 mM sucrose were used, respectively. In particular, non-responder cells expressing TRPA1 channels were tested with electrophilic NMM that commonly activates TRPA1s.
