# Supplementary material for: Nucleophile sensitivity of Drosophila TRPA1 underlies light-induced feeding deterrence
Source: eLife journal article supplement (doi:10.7554/elife.18425), 2016-09-22
Supplement: supp [file elife-18425-supp-v1.zip › elife_poa_e18425_Figure_1_figure_supplement_3.pdf]

## Figure 1-figure supplement 3

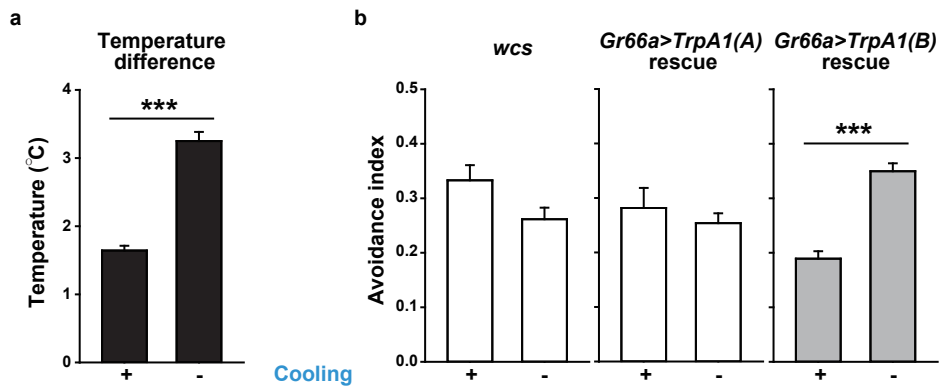

**Figure 1-figure supplement 3: Temperature changes in Café assays that measure UV-dependent feeding avoidance. (a)** Temperature increases inside of vials with (n=21) or without (n=8) active air-cooling. **(b)** UV-induced feeding avoidance was temperature-dependent only for those expressing highly temperature-sensitive TRPA1(B) (n=4-9). \*\*\*: p<0.001, Student's t-test or Mann-Whitney U test.
