# Supplementary material for: Nucleophile sensitivity of Drosophila TRPA1 underlies light-induced feeding deterrence
Source: eLife journal article supplement (doi:10.7554/elife.18425), 2016-09-22
Supplement: supp [file elife-18425-supp-v1.zip › elife_poa_e18425_Figure_2_figure_supplement_1.pdf]

## Figure 2- figure supplement 1

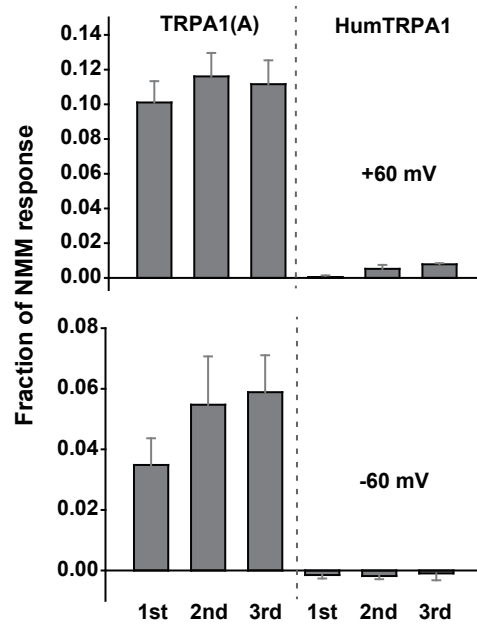

**Figure 2-figure supplement 1: Human TRPA1 (humTRPA1) is not activated by the UV intensity at which *Drosophila* TRPA1(A) is.** Three serial 295-nm UV pulses at 5.2 mW/cm<sup>2</sup> were illuminated to oocytes expressing indicated TRPA1s. The UV-elicited current amplitudes at +60 or -60 mV were normalized to the 0.1 mM NMM-evoked current and averaged (n=4-8).
