# Supplementary material for: Nucleophile sensitivity of Drosophila TRPA1 underlies light-induced feeding deterrence
Source: eLife journal article supplement (doi:10.7554/elife.18425), 2016-09-22
Supplement: supp [file elife-18425-supp-v1.zip › elife_poa_e18425_Figure_2_figure_supplement_2.pdf]

## Figure 2- figure supplement 2

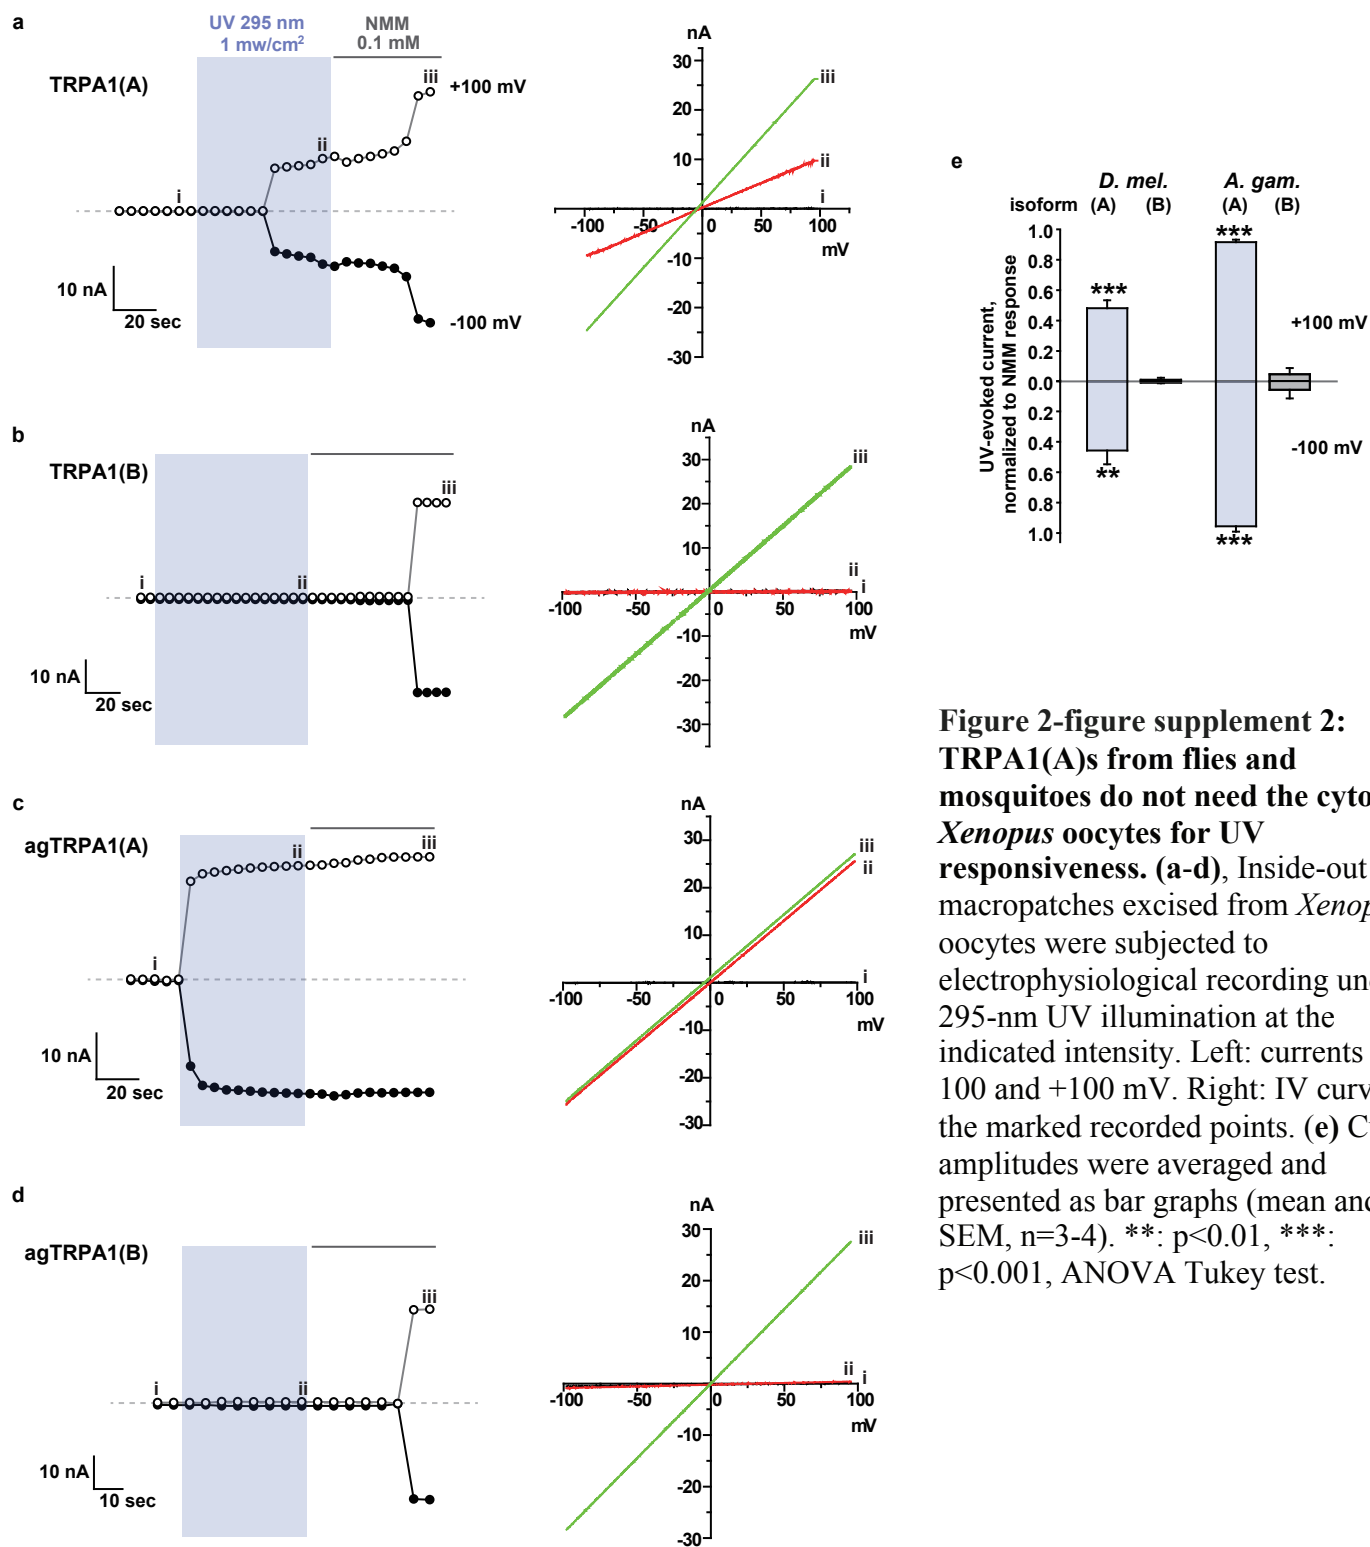

**Figure 2-figure supplement 2:**  
TRPA1(A)s from flies and mosquitoes do not need the cytosol of *Xenopus* oocytes for UV responsiveness. (a-d), Inside-out macropatches excised from *Xenopus* oocytes were subjected to electrophysiological recording under 295-nm UV illumination at the indicated intensity. Left: currents at -100 and +100 mV. Right: IV curves at the marked recorded points. (e) Current amplitudes were averaged and presented as bar graphs (mean and SEM, n=3-4). \*\*: p<0.01, \*\*\*: p<0.001, ANOVA Tukey test.
