# Supplementary material for: Nucleophile sensitivity of Drosophila TRPA1 underlies light-induced feeding deterrence
Source: eLife journal article supplement (doi:10.7554/elife.18425), 2016-09-22
Supplement: supp [file elife-18425-supp-v1.zip › elife_poa_e18425_Figure_3_figure_supplement_1.pdf]

## Figure 3- figure supplement 1

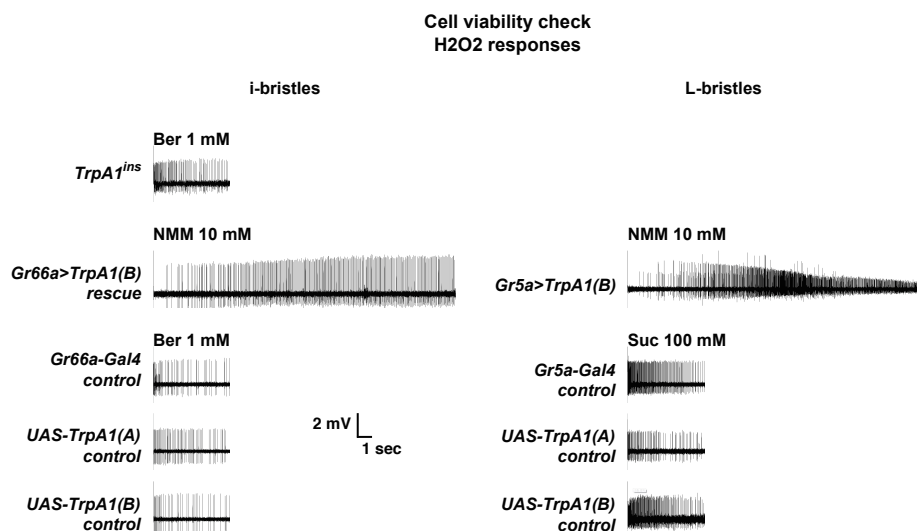

**Figure 3-figure supplement 1: Cell viability check for non-responders in extracellular recording experiments.** The non-responding bristle sensilla in the experiments examining H<sub>2</sub>O<sub>2</sub> responsiveness were stimulated by other tastants activating corresponding cells. For i- and L-bristles, 1 mM berberine and 100 mM sucrose were used, respectively. Non-responder cells expressing TRPA1 channels were tested with electrophilic NMM that commonly activates TRPA1s.
