# Supplementary material for: Nucleophile sensitivity of Drosophila TRPA1 underlies light-induced feeding deterrence
Source: eLife journal article supplement (doi:10.7554/elife.18425), 2016-09-22
Supplement: supp [file elife-18425-supp-v1.zip › elife_poa_e18425_Figure_4_figure_supplement_1.pdf]

## Figure 4-figure supplement 1

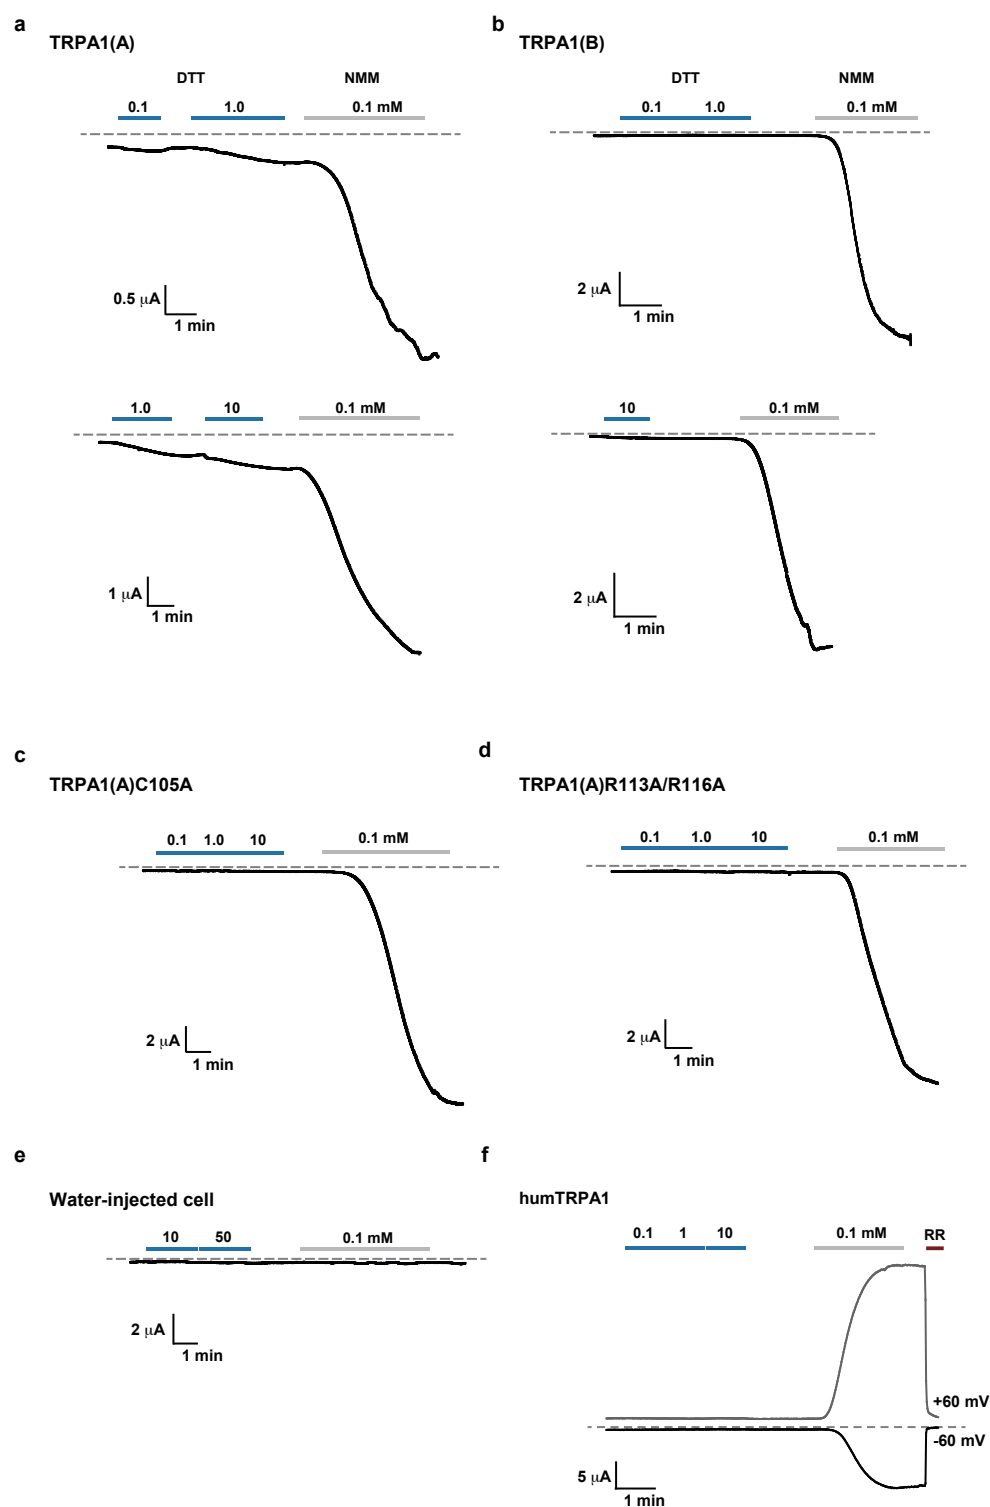

**Figure 4-figure supplement 1: Representative TRPA1 currents evoked by DTT in *Xenopus* oocytes.** DTT-induced currents were compared with responses to 0.1 mM NMM for TRPA1s as indicated. **(a-e)**, Voltage-clamped at -60 mV. **(f)** A 300-msec voltage ramp between -60 and +60 mV was applied every second. Currents at either -60 or +60 mV were plotted as a function of time. RR: ruthenium red at 50  $\mu$ M.
