# Supplementary material for: Nucleophile sensitivity of Drosophila TRPA1 underlies light-induced feeding deterrence
Source: eLife journal article supplement (doi:10.7554/elife.18425), 2016-09-22
Supplement: supp [file elife-18425-supp-v1.zip › elife_poa_e18425_Figure_4_figure_supplement_2.pdf]

## Figure 4-figure supplement 2

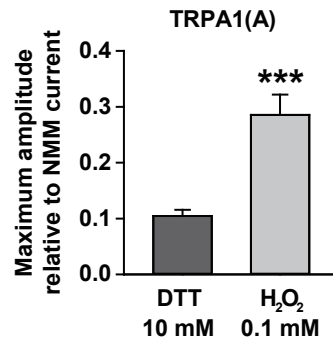

**Figure 4-figure supplement 2: Maximal current amplitudes of TRPA1(A) by H<sub>2</sub>O<sub>2</sub> were intermediate between those of DTT and NMM.** TRPA1(A) currents in *Xenopus* oocytes that were evoked by either 10 mM DTT (n=5) or 0.1 mM H<sub>2</sub>O<sub>2</sub> (n=10) were normalized by currents induced by following 0.1 mM NMM application. The indicated concentrations for the chemicals yielded maximal current responses at -60 mV which were used for estimation of the maximum current amplitudes. \*\*\*: p<0.001. Mann-Whitney U test.
