# Supplementary material for: Nucleophile sensitivity of Drosophila TRPA1 underlies light-induced feeding deterrence
Source: eLife journal article supplement (doi:10.7554/elife.18425), 2016-09-22
Supplement: supp [file elife-18425-supp-v1.zip › elife_poa_e18425_Figure_4_figure_supplement_3.pdf]

## Figure 4-figure supplement 3

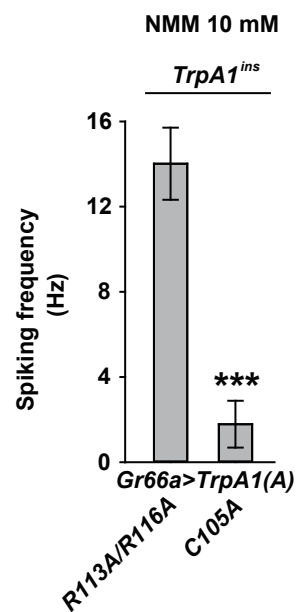

**Figure 4-figure supplement 3: Expression of *TrpA1(A)C105A* in bitter-tasting neurons failed to exhibit robust NMM-induced action potentials.** Spiking frequencies of bitter neurons expressing either *TrpA1(A)C105A* (n=6) or *TrpA1(A)R113A/R116A* (n=7) in *TrpA1*-deficient mutant animals were plotted. \*\*\*: p<0.001, Student's t-test.
