# Supplementary material for: Nucleophile sensitivity of Drosophila TRPA1 underlies light-induced feeding deterrence
Source: eLife journal article supplement (doi:10.7554/elife.18425), 2016-09-22
Supplement: supp [file elife-18425-supp-v1.zip › elife_poa_e18425_Figure_5_figure_supplement_1.pdf]

## Figure 5-figure supplement 1

a

DTT

agTRPA1(A)

agTRPA1(B)

( $\mu$ M)

0.01 0.1 10 100

RR NMM RR

100 1,000

NMM

RR

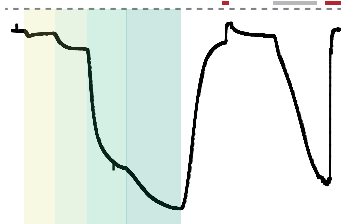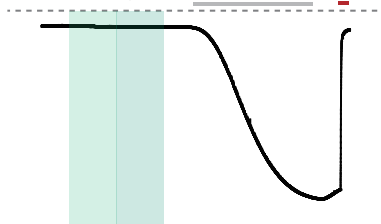

0.5  $\mu$ A  
1 min

b

H<sub>2</sub>O<sub>2</sub>

agTRPA1(A)

agTRPA1(B)

( $\mu$ M)

0.1 1.0 10 100

RR NMM RR

(mM)

0.25 0.5 2.5 10

RR

NMM RR

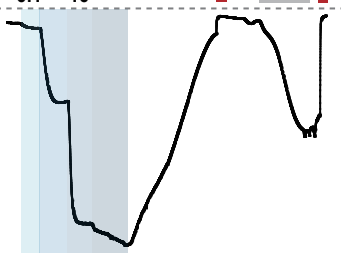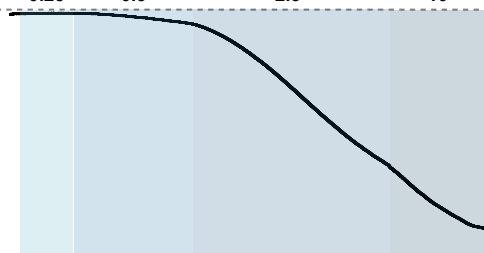

3  $\mu$ A  
1 min

**Figure 5-figure supplement 1: Typical DTT (a) and H<sub>2</sub>O<sub>2</sub> (b) responses of agTRPA1(A) and agTRPA1(B) heterologously expressed in *Xenopus* oocytes. RR: 50  $\mu$ M ruthenium red. NMM: 0.1 mM N-methyl maleimide. DTT and H<sub>2</sub>O<sub>2</sub> concentrations are indicated in the figure. Voltage clamped at -60 mV. Dashed line represents the base line.**
