# Supplementary material for: Nucleophile sensitivity of Drosophila TRPA1 underlies light-induced feeding deterrence
Source: eLife journal article supplement (doi:10.7554/elife.18425), 2016-09-22
Supplement: supp [file elife-18425-supp-v1.zip › elife_poa_e18425_Figure_6_figure_supplement_1.pdf]

# Figure 6-figure supplement 1

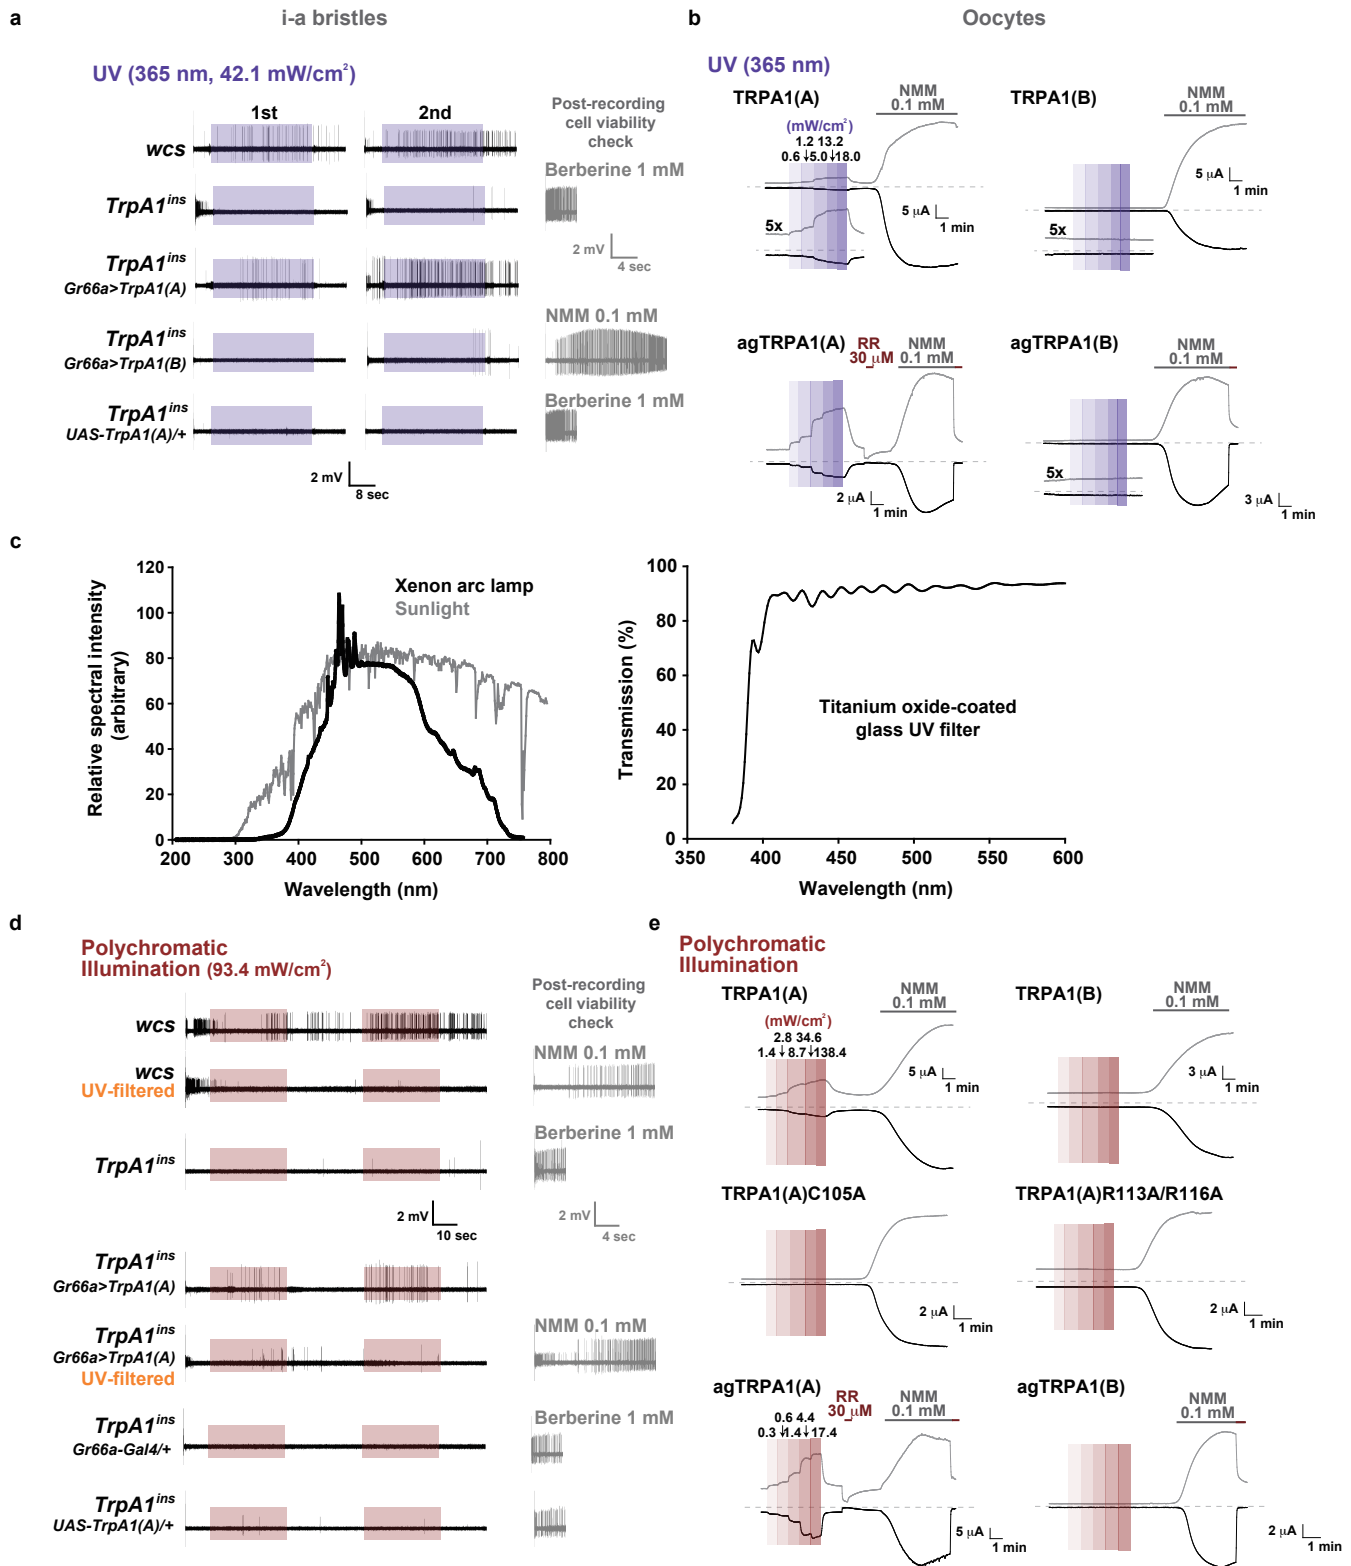

**Figure 6-figure supplement 1: TRPA1(A)-dependent neuronal and heterologous responses to UVA and white light.**

(a) Representative sensillum recording results with 365-nm UVA. The right panels confirm the viability of non-responders. (b) Typical TEVC recording results with indicated TRPA1 isoforms from flies (upper) and mosquitoes (lower). Insets marked with '5x' show current traces magnified five times for clear presentation, while scale bars are drawn for 1x traces. (c) *Left*, relative spectral intensities of the Xenon arc lamp (black, DG4, Sutter instruments, NJ, USA) or sunlight on the ground (grey). *Right*, light transmission through the UV filter used in Figure 6. Around 90% of light within the visible spectrum can pass through the filter. (d) Representative sensillum recordings with white light illumination with indicated genotypes. The right panels confirm the viability of non-responders. (e) Typical TEVC recordings with indicated TRPA1 isoforms from flies (upper and middle) and mosquitoes (lower). TRPA1(A) mutants that lack nucleophile sensitivity did not respond to white light (middle). Colored boxes indicate the time windows of light illumination.
