# Supplementary material for: Nucleophile sensitivity of Drosophila TRPA1 underlies light-induced feeding deterrence
Source: eLife journal article supplement (doi:10.7554/elife.18425), 2016-09-22
Supplement: supp [file elife-18425-supp-v1.zip › elife_poa_e18425_Figure_6_figure_supplement_2.pdf]

## Figure 6-figure supplement 2

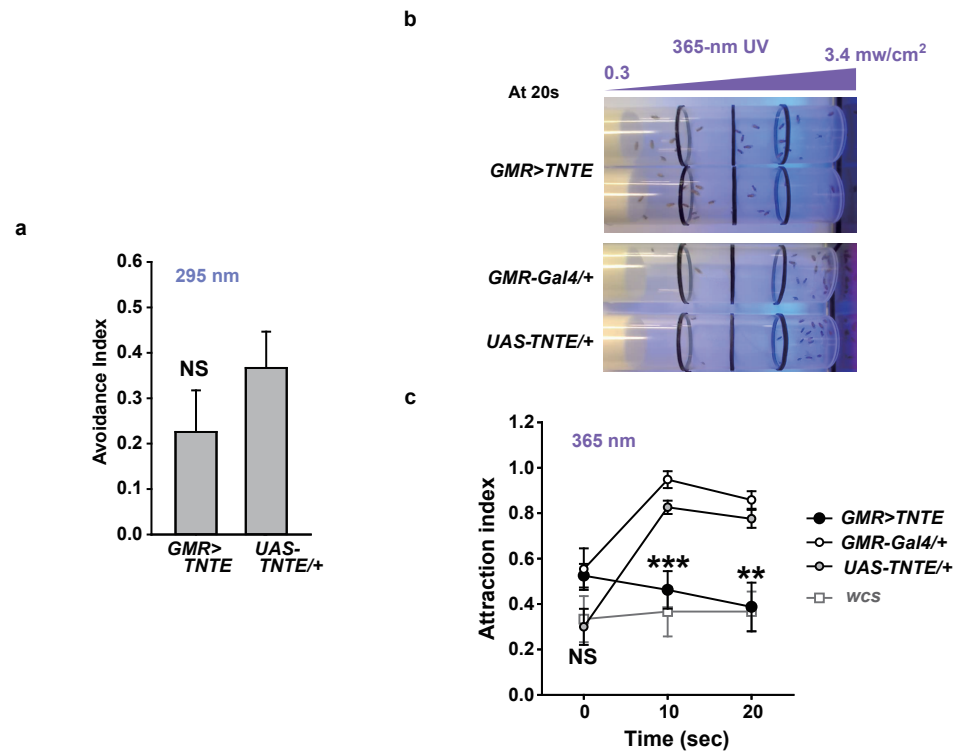

**Figure 6-figure supplement 2: Photoreceptors are important for UVA attraction not for UVB-dependent feeding suppression.** (a) UVB-illuminated Café assay results with the animals in which chemical synaptic transmission of photoreceptors is silenced by the tetanus toxin light chain. NS: not significant. (b) Typical results showing UVA attraction of indicated genotypes. The purple ramp illustrates putative UVA gradient between measured intensities at two internal extremes of the vial. Twenty sec after illumination control flies mostly reside at the side of the UVA source, while flies with silenced neurons did not. (c) Summary of experiments in (b) and experiments with *wcs* (grey). \*\*\*:  $p < 0.001$ , Tukey test.
