# Supplementary material for: Nucleophile sensitivity of Drosophila TRPA1 underlies light-induced feeding deterrence
Source: eLife journal article supplement (doi:10.7554/elife.18425), 2016-09-22
Supplement: supp [file elife-18425-supp-v1.zip › elife_poa_e18425_Figure_6_figure_supplement_3.pdf]

## Figure 6-figure supplement 3

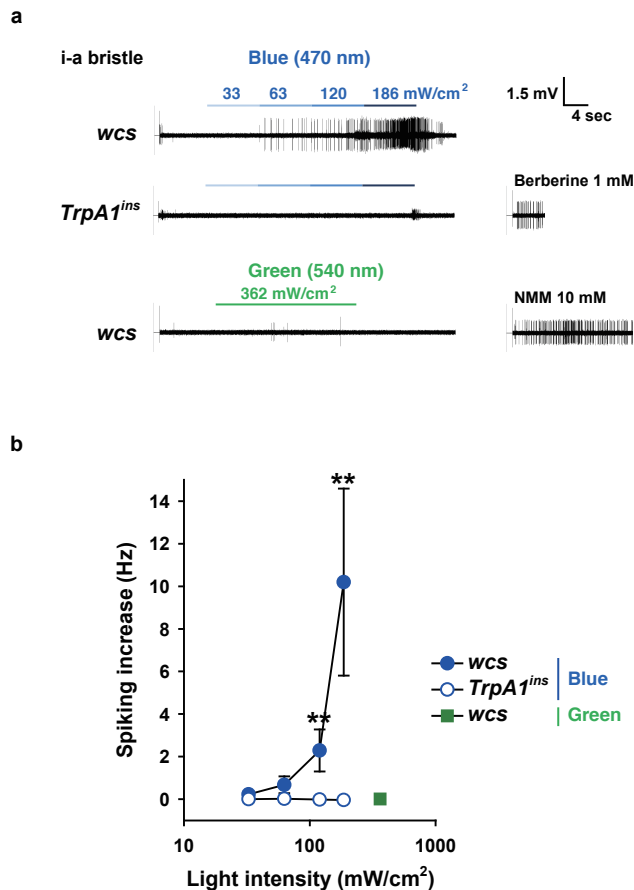

**Figure 6-figure supplement 3: Blue but not green light is capable of activating taste neurons depending on *TrpA1*.** (a) Increasing intensities of blue light at 470 nm were illuminated as indicated to i-a bristles of WT and *TrpA1<sup>ins</sup>*. Green light did not elicit action potentials at a much higher intensity (bottom). (b) Averaged data (n=5-8). \*\*: p<0.01, \*\*\*: p<0.001, Mann-Whitney test between WT and *TrpA1<sup>ins</sup>*.
