# Supplementary material for: Nucleophile sensitivity of Drosophila TRPA1 underlies light-induced feeding deterrence
Source: eLife journal article supplement (doi:10.7554/elife.18425), 2016-09-22
Supplement: supp [file elife-18425-supp-v1.zip › elife_poa_e18425_Figure_7_figure_supplement_1.pdf]

## Figure 7-figure supplement 1

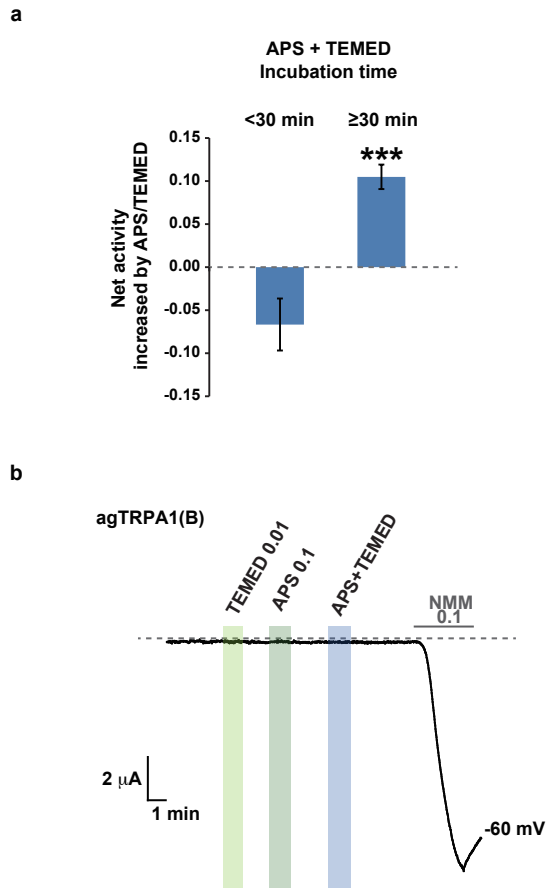

**Figure 7-figure supplement 1: TRPA1(A)-specific activation by the APS+TEMED mixture is time-dependent.** (a) The levels of net current increases resulting from APS and TEMED mixture (0.1 and 0.01 mM, respectively) are binned into two groups based on incubation time as indicated and compared for the efficacy in activating agTRPA1(A) expressed in frog oocytes (n=6 and 10). \*\*\*:  $p < 0.001$ , Student's t-test. (b) agTRPA1(B) did not respond to indicated chemicals, while it generated large NMM current in oocytes.
