# Supplementary figures and images for: Nucleophile sensitivity of Drosophila TRPA1 underlies light-induced feeding deterrence
Source: eLife journal article supplement (doi:10.7554/elife.18425), 2016-09-22

## Figure 2- figure supplement 2

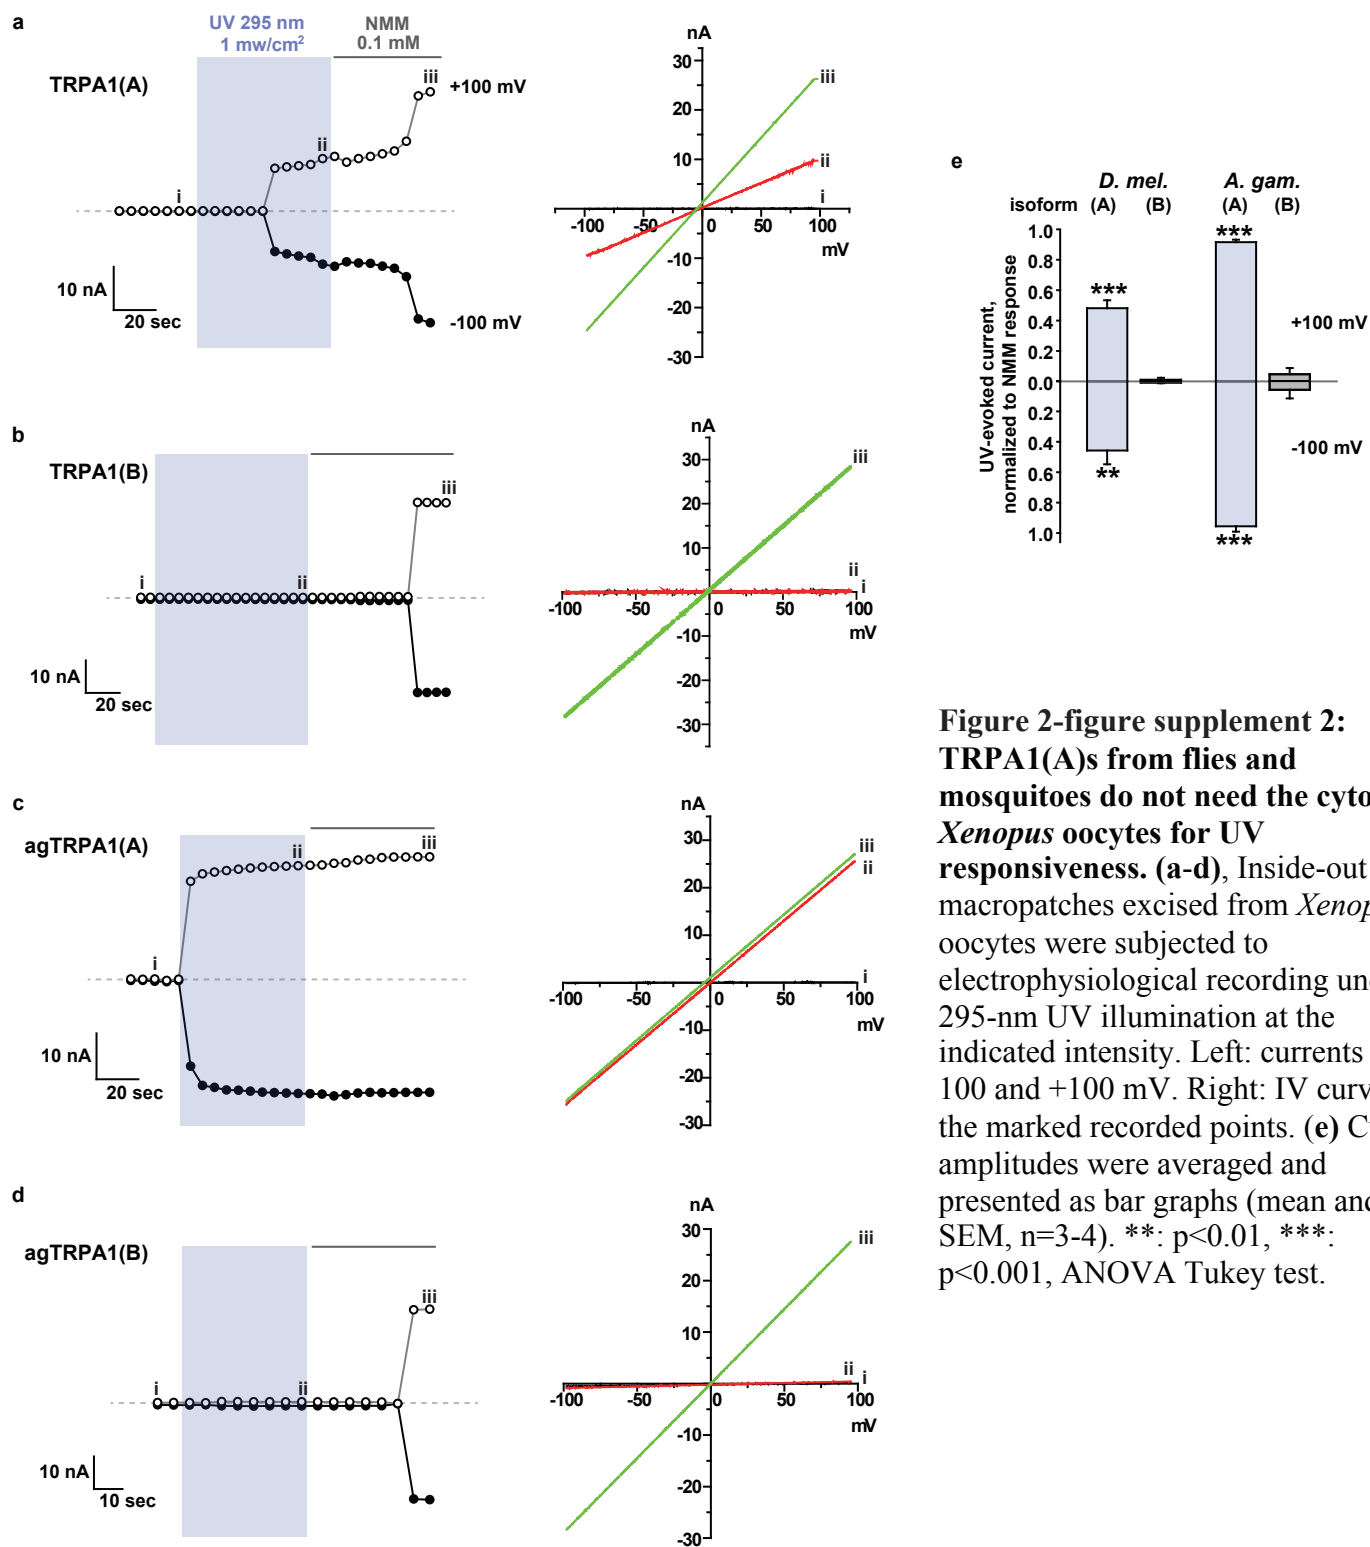

Supplement: supp [file elife_poa_e18425_Figure_2_figure_supplement_2.pdf › elife_poa_e18425_Figure_2_figure_supplement_2.pdf]
